# Supplementary material
Source: PubMed Central journal article supplement (PMC4168404)
Supplement: gf512sup_10-1055-s-0032-1315131.pdf [file gf512sup_10-1055-s-0032-1315131.pdf]

# Mammakarzinom 2012 – neue Aspekte

## Breast Cancer 2012 – New Aspects

### Autoren

H.-C. Kolberg<sup>1</sup>, D. Lüftner<sup>2</sup>, M. P. Lux<sup>3</sup>, N. Maass<sup>4</sup>, F. Schütz<sup>5</sup>, P. A. Fasching<sup>6</sup>, T. Fehm<sup>7</sup>, W. Janni<sup>8</sup>, S. Kümmel<sup>9</sup>

### Institute

Die Institutsangaben sind am Ende des Beitrags gelistet

### Schlüsselwörter

- CLEOPATRA
- Pertuzumab
- BOLERO-2
- Everolimus
- EMILIA
- TDM-1
- ABCSG-12
- ZO-FAST
- NSABP-B34
- GAIN

### Key words

- CLEOPATRA
- pertuzumab
- BOLERO-2
- everolimus
- EMILIA
- TDM-1
- ABCSG-12
- ZO-FAST
- NSABP-B34
- GAIN

**eingereicht** 18.6.2012

**revidiert** 23.6.2012

**akzeptiert** 23.6.2012

### Bibliografie

**DOI** <http://dx.doi.org/10.1055/s-0032-1315131>  
 Geburtsh Frauenheilk 2012; 72:  
 1–14 © Georg Thieme  
 Verlag KG Stuttgart · New York ·  
 ISSN 0016-5751

### Korrespondenzadresse

**Prof. Peter A. Fasching, MD**  
 University Hospital Erlangen  
 Department of Gynecology  
 and Obstetrics  
 Universitätsstraße 21–23  
 91054 Erlangen  
[peter.fasching@uk-erlangen.de](mailto:peter.fasching@uk-erlangen.de)

### Zusammenfassung

Die Behandlungsoptionen und auch die Charakteristika zur Therapieentscheidung der Patientin mit einem primären und fortgeschrittenen Mammakarzinom werden immer vielfältiger. Neue zielgerichtete Therapien in Kombination mit etablierten Chemotherapien erweitern das Spektrum, doch potenziell vielversprechende Kombinationen bringen nicht immer ein besseres Ergebnis. Neueste Daten aus der Pharmakogenomik weisen auf Prognose- und Prädiktivfaktoren hin, die nicht nur die Eigenschaften des Tumors, sondern auch die vererbten genetischen Eigenschaften der Patientin berücksichtigen. Die aktuelle Therapieentscheidung ist somit mittlerweile eine Kombination aus klassischerweise klinischen und modernen molekularen Biomarkern. Immer häufiger werden auch gesundheitsökonomische Aspekte berücksichtigt, sodass auch gesundheitspolitische Überlegungen eine Rolle spielen können. Dieser Übersichtsartikel baut auf den aktuellen Kongressen auf, die jedes Jahr stattfinden. Die letzten berücksichtigten sind hierbei das 34. San Antonio Breast Cancer Symposium und das ASCO Annual Meeting 2012. Zu deren Highlights zählen die klinisch bedeutsamen Ergebnisse der Studien CLEOPATRA, BOLERO-2, EMILIA und SWOG S0226 zur Therapie des metastasierten Mammakarzinoms sowie weitere aktuelle Daten zum adjuvanten Einsatz der Bisphosphonate im Rahmen der Studien ABCSG-12, ZO-FAST, NSABP-B34 und GAIN.

### Einleitung

Die Therapie des Mammakarzinoms hat in den letzten Jahrzehnten eine deutliche Veränderung durchgemacht [1,2]. Die gewissenhafte Abwägung von Invasivität des Eingriffs in den menschlichen Körper und Nutzen in Bezug auf reduzierte

### Abstract

Treatment options as well as the characteristics for therapeutic decisions in patients with primary and advanced breast cancer are increasing in number and variety. New targeted therapies in combination with established chemotherapy schemes are broadening the spectrum, however potentially promising combinations do not always achieve a better result. New data from the field of pharmacogenomics point to prognostic and predictive factors that take not only the properties of the tumour but also inherited genetic properties of the patient into consideration. Current therapeutic decision-making is thus based on a combination of classical clinical and modern molecular biomarkers. Also health-economic aspects are more frequently being taken into consideration so that health-economic considerations may also play a part. This review is based on information from the recent annual congresses. The latest of these are the 34th San Antonio Breast Cancer Symposium 2011 and the ASCO Annual Meeting 2012. Among their highlights are the clinically significant results from the CLEOPATRA, BOLERO-2, EMILIA and SWOG S0226 trials on the therapy for metastatic breast cancer as well as further state-of-the-art data on the adjuvant use of bisphosphonates within the framework of the ABCSG-12, ZO-FAST, NSABP-B34 and GAIN trials.

Sterblichkeit und Rückfallrate wurde seit der Einführung der brusterhaltenden Therapie mit Brustbestrahlung und seit Einführung der Chemotherapie immer weiter verfeinert. Ziele der modernen Therapie von heute sind die genaue Abstimmung der Therapie nicht nur auf die Aggressivität der Erkrankung, sondern auch auf

das individuelle Therapieansprechen und mögliche unerwünschte Nebenwirkungen bei der Patientin. Dies wird nicht nur durch die Entwicklung von neuen Medikamenten, sondern auch durch die Integration von individuellen Biomarkern, die die Effektivität und Nebenwirkungen eines Medikaments vorhersagen können, in moderne Studiendesigns gewährleistet. Diese Übersichtsarbeit nimmt die letzten Kongresse, wie z. B. den Brustkrebskongress in San Antonio im Dezember 2011 und das 2012 ASCO Annual Meeting, als Anlass, den aktuellen Stand der Brustkrebstherapien zu reflektieren und von neuen, aktuellen Entwicklungen zu berichten.

## Lokale Therapien

### ▼ Sentinel Node Biopsy und axilläres Staging

Die Einführung der brusterhaltenden Therapie mit nachfolgender Bestrahlung war einer der großen Erfolge, welcher in der lokalen Therapie die Lebensqualität der Patientin deutlich verbesserte und die onkologische Sicherheit nicht gefährdete [3,4]. Ähnlich konnte die Einführung der Technik der Sentinel-Node-Biopsie die bis dahin hohe Prävalenz des Lymphödems nach Mammakarzinom [5] deutlich reduzieren [6]. Seitdem hat sich ein Paradigmenwechsel im Management der axillären Lymphknoten vollzogen, der immer noch Gegenstand aktueller Diskussionen ist [7]. In den Leitlinien der Kommission Mamma der Arbeitsgemeinschaft für Gynäkologische Onkologie (AGO; [www.ago-online.de](http://www.ago-online.de)) ist der Verzicht auf die Komplettierung des Axilla-Stagings durch eine systematische Dissektion der Level I und II sowohl bei Mikrometastasen im Sentinel-Lymphknoten als auch bei unter 3 Lymphknoten mit Makrometastasen in den Fällen festgehalten, in denen eine brusterhaltende Therapie mit nachfolgender Ganzbrustbestrahlung erfolgt.

Ob es sich bei dem fehlenden therapeutischen Effekt der Axilladisektion um eine Auswirkung der systemischen Therapieentscheidung oder um einen ungeplanten therapeutischen Effekt der Tangentialbestrahlung handelt, ist nicht abschließend geklärt, weitere Daten sind notwendig [7].

In der IBCSG-23-01-Studie wurden 931 Patientinnen mit Mikrometastasen im Sentinel entweder zu einem abwartenden Vorgehen oder zur systematischen Axilladisektion randomisiert [8]. 75% der Patientinnen erhielten eine brusterhaltende Therapie, etwa 90% wurden postoperativ bestrahlt. Leider wurde die Rekrutierung vorzeitig beendet (Rekrutierungsziel waren 1960 Patientinnen), da die Rekrutierung zu langsam lief und weniger Ergebnisse auftraten als erwartet. Zum Zeitpunkt der Auswertung betrug der mediane Nachbeobachtungszeitraum 49 Monate. Das Disease-free Survival (DFS) nach 5 Jahren zeigte keine Unterschiede und betrug für die Gruppe ohne Axilladisektion ( $n=467$ ) 88,4% und für die Gruppe mit Axilladisektion ( $n=464$ ) 87,3%. Das Gesamtüberleben war mit 98% nach 5 Jahren exzellent und in beiden Gruppen gleich [8]. Trotz der schlechten Rekrutierung und der fehlenden Stratifizierung nach Art der Brustoperation und durchgeführter Bestrahlung unterstreichen diese Daten sehr eindrücklich, dass im Falle von Mikrometastasen im Sentinel-Lymphknoten eine systematische Axilladisektion nicht indiziert ist [9–12]. Betrachtet man diese Ergebnisse im Licht der Daten der NSABP-B32-Studie [12], so ergibt sich die Frage, welche Patientinnen nach SLNB mit befallenem Sentinel-Lymphknoten überhaupt eine systematische Axilladisektion benötigen. In der NSABP-B32 hatte sich bei über 4000 Patientinnen kein Unterschied für das Rezidivrisiko oder das Gesamtüberleben für Pa-

tientinnen mit befallenem Sentinel-Lymphknoten im Vergleich zu Patientinnen mit freiem Sentinel gezeigt [12]. In die gleiche Richtung wiesen die Daten von Giuliano, der ebenfalls keine Unterschiede zwischen Frauen mit befallenem und freiem SLN fand [11]. Die Diskussion über den therapeutischen Wert der Axilladisektion ist nicht neu [10], allerdings darf hier nicht vergessen werden, dass der Wert des axillären Stagings vor allem in einer Triage liegt. So profitieren Patientinnen mit 3 und mehr befallenen Lymphknoten von einer dosisdichten Chemotherapie [9]. Insofern ist die Empfehlung der AGO, bei bis zu 2 befallenen SLN auf die Axilladisektion zu verzichten, konsequent und eine vernünftige Leitlinie für die tägliche Arbeit in der Beratung von Patientinnen ([www.ago-online.de](http://www.ago-online.de)).

### Radiatio: Teilbrustbestrahlung mit Brachytherapie

Die Ganzbrustbestrahlung mit oder ohne Boost ist laut Kommission Mamma der AGO der aktuelle Behandlungsstandard nach der brusterhaltenden Operation eines invasiven Mammakarzinoms [13]. Zunehmend wird der externe Boost abgelöst von Techniken der intraoperativen Bestrahlung mit Elektronen- oder Röntgenstrahlen oder von interstitieller Brachytherapie. Die alleinige Bestrahlung mit diesen Techniken ist experimentell, da immer noch keine belastbaren Daten zu Langzeitergebnissen vorliegen [14,15].

Dennoch werden Techniken der Teilbrustbestrahlung insbesondere bei älteren Patientinnen in den USA auch außerhalb von Studien eingesetzt [16]. In einer retrospektiven Untersuchung wurden die Krankenkassendaten (Medicare) von Patientinnen nach einer Ganzbrustbestrahlung (WBI) mit denen von Patientinnen nach einer APBB (accelerated partial breast brachytherapy) verglichen [16]. Insgesamt wurden 130535 Frauen über 66 Jahre identifiziert, bei denen eine der obengenannten Therapieoptionen zulasten öffentlicher Kostenträger zwischen 2000 und 2007 abgerechnet wurden. Betrug der Anteil der APBB 2000 nur etwa 1%, war er bis 2007 auf 13% angestiegen. Die Patientinnen mit APBB waren im Schnitt älter, kränker und hatten seltener befallene Lymphknoten oder eine Chemotherapie erhalten. Als Parameter für das Versagen der lokalen Therapie hatten die Autoren die Rate der sekundären Mastektomien definiert. Nach 5 Jahren war hier die Rate für die APBB-Gruppe signifikant höher als für die WBI-Gruppe (APBB: 4,0%; WBI: 2,2%,  $p<0,001$ ). Auch akute Komplikationen waren für die APBB-Gruppe ungünstiger als für die Gruppe mit Ganzbrustbestrahlung (Hospitalisation bei APBB: 9,6%; bei WBI: 5,7%,  $p<0,001$ ; Infektion bei APBB: 8,1%; bei WBI: 4,5%,  $p<0,001$ ). Dasselbe Bild zeigt sich bei Betrachtung der Langzeitkomplikationen, bei denen ebenfalls die Gruppe nach Brachytherapie unterlegen war (Rippenfraktur bei APBB: 4,2%; bei WBI: 3,6%; FGW-Nekrose bei APBB: 9,1%; bei WBI: 3,7%; Schmerzen bei APBB: 14,9%; bei WBI: 11,7%;  $p$  für alle Vergleiche  $<0,001$ ). Lediglich bei der Inzidenz der Pneumonitis war die APBB-Gruppe mit 0,1% günstiger als die WBI-Gruppe mit 0,8% ( $p<0,001$ ). Smith et al. interpretierten ihre Daten aufgrund des retrospektiven Designs und der schlecht balancierten Gruppen nicht als Unterlegenheitsbeweis der Brachytherapie, sondern als dringenden Aufruf, vor der Anwendung solcher Methoden in der Breite außerhalb von experimentellen Settings die Ergebnisse der randomisierten klinischen Studien abzuwarten [16].

Dem ist in aller Deutlichkeit beizupflichten. Erschreckend ist, dass in den USA 13% der hier untersuchten Patientinnen mit einer Methode behandelt wurden, für die praktisch keine Daten vorliegen. Es besteht die Gefahr, dass durch solche Vorgehensweisen vielversprechende Therapieansätze in Verruf geraten, be-

vor noch ihre Wirksamkeit und ihre Risiken untersucht werden konnten.

### DCIS: Prognoseabschätzung

Der Standard in der lokalen Behandlung des duktales Carcinoma in situ (DCIS) ist die brusterhaltende Operation mit nachfolgender Ganzbrustbestrahlung ohne Boost oder die Mastektomie. Nachdem über viele Jahre versucht wurde, eine Gruppe zu identifizieren, die nicht von einer Bestrahlung profitiert, ist in den aktuellen Leitlinien der Kommission Mamma der AGO eine generelle Empfehlung zur Bestrahlung ohne Identifikation von unterschiedlichen Risikogruppen etabliert. Der Verzicht auf die Radiotherapie erhöht nach momentaner Datenlage grundsätzlich das Rezidivrisiko, ohne das Gesamtüberleben zu kompromittieren [17–19]. Um allerdings Patientinnen mit DCIS über ihr Rezidivrisiko und damit über das absolute Risiko bei Verzicht auf eine Radiotherapie sinnvoll aufzuklären, fehlen bisher belastbare Daten.

In der Studie E5194 der ECOG wurden 670 Patientinnen untersucht, die bei einem DCIS brusterhaltend operiert wurden. Der freie Randsaum war mit  $\geq 3$  mm definiert, 228 Patientinnen erhielten Tamoxifen, keine der Patientinnen wurde bestrahlt. Die in dieser Gruppe gefundenen Rezidivraten variierten stark in Abhängigkeit von Alter, Größe der Läsion und Grading. Lediglich für die Gruppe der High-Grade-DCIS konnte unabhängig gezeigt werden, dass die Rezidivraten ohne Radiotherapie inakzeptabel hoch waren [20]. In einer neueren Analyse derselben Arbeitsgruppe wurden 327 Patientinnen aus der Hauptstudie im Hinblick auf molekulare Marker untersucht. An Paraffinblöcken wurden molekulare Marker mittels PCR auf Expression untersucht. Mit diesen Markern wurde ein modifizierter Recurrence-Score® (Oncotype DX®) für das DCIS entwickelt, um das Rezidivrisiko vorherzusagen [21]. Das 10-Jahres-Risiko in der Gesamtkohorte für ein Lokalrezidiv lag bei 15,4% (invasiv: 5,6% für das gut oder mittelgradig differenzierte DCIS und bei 15,1% (invasiv: 9,8%) für das schlecht differenzierte DCIS, wobei die Ergebnisse des Gradings zwischen lokaler und zentraler Pathologie große Unterschiede zeigten. Die Ergebnisse modifiziert nach dem neuen DCIS-Score nach einem medianen Follow-up von 8,8 Jahren sind in der folgenden **Tab. 1** dargestellt.

Der in **Tab. 1** dargestellte signifikante Zusammenhang zwischen den Risikogruppen und dem Rezidivrisiko war unabhängig vom Einsatz von Tamoxifen und von der Größe des freien Randsaums. Der klassische Recurrence-Score® zeigte keinen Zusammenhang mit den lokalen Ereignissen.

Es handelt sich bei dem neuen DCIS-Score um einen prospektiv untersuchten Test, der das Rezidivrisiko quantitativ erfasst und klassische Prognosefaktoren ergänzt, wobei er zunächst nur bei Patientinnen untersucht wurde, die keine Bestrahlung erhalten

**Tab. 1** Wahrscheinlichkeiten für ein Lokalrezidiv (LRFS) nach DCIS in Abhängigkeit von der Expression mehrerer Gene [21] (\*  $p = 0,02$ ; \*\*  $p = 0,01$ ).

| DCIS-Score Risiko Gruppe | n   | LRFS für ipsilaterales Lokalrezidiv (invasiv oder DCIS)* | LRFS für ipsilaterales invasives Lokalrezidiv** |
|--------------------------|-----|----------------------------------------------------------|-------------------------------------------------|
| low (<39)                | 246 | 12%                                                      | 5,1%                                            |
| intermediate (39–54)     | 45  | 24,5%                                                    | 8,9%                                            |
| high ( $\geq 55$ )       | 36  | 27,3%                                                    | 19,1%                                           |

haben. Insofern ist er eine neue Option zur Risikoabschätzung beim brusterhaltenden DCIS, der zur Beratung von Patientinnen herangezogen werden kann.

### Neoadjuvante Therapie

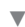

Nach der Etablierung der neoadjuvanten Therapie bei der Behandlung des Mammakarzinoms in den 1990er-Jahren konnten besonders deutsche Studiengruppen dazu beitragen, dass sich dieses Therapiekonzept in der Routineversorgung der Patientinnen integriert hat und dass die hierbei gewonnenen Erkenntnisse auch für die Forschung genutzt werden können. Dies zeigte sich durch eine Vielzahl von großen prospektiv randomisierten Studien [22–27]. Auch die Etablierung der pathologisch kompletten Remission (pCR) als außerordentlich starker Surrogatmarker für die Prognose der Patientin in einigen molekularen Subgruppen macht die Stärke dieses Therapiekonzepts bei der Identifikation einer Chemotherapieresistenz und deren Bedeutung für die Prognose deutlich [27]. Zudem können auch über den Einsatz neuer Substanzen in dieser Therapiesituation wichtige Informationen gewonnen werden.

### Anti-HER2-Therapie mit Pertuzumab in der neoadjuvanten Situation

In der 4-armigen NeoSphere-Studie wurde bei HER2-positiven Mammakarzinompatientinnen die neoadjuvante duale HER2-Antikörper-Blockade mit Pertuzumab (P) und Trastuzumab (T) sowie Docetaxel (D) mit der dualen Blockade allein oder dem jeweiligen Antikörper allein in Kombination mit Docetaxel verglichen [28]. Die duale Blockade in Kombination mit Docetaxel zeigte eine signifikante Verbesserung der pCR-Rate ohne relevante Toxizitätsunterschiede (pCR bei P+T+D 45,8%; 95%-KI: 36,1–55,7 vs. pCR bei T+D 29,0%; 95%-KI: 20,6–38,5;  $p = 0,0141$ ). Die Kombination von Pertuzumab und Trastuzumab ohne Chemotherapie hat mit einem günstigen Verträglichkeitsprofil immerhin eine pCR-Rate von 16,8% (95%-KI: 10,3–25,3) erreicht [29]. Leider hat eine in San Antonio 2011 vorgestellte umfangreiche Suche nach Biomarkern für das Ansprechen auf die Therapie keine überzeugenden Daten geliefert. Alle Parameter erwiesen sich im klinischen Alltag als unzureichend, um zusätzlich oder als Alternative zur üblichen Bestimmung von HER2 mittels Immunhistochemie oder FISH-Testung als gute Surrogatmarker für das Ansprechen der Therapie dienen zu können. Selbst die großen Hoffnungen, die man in den Marker p95 als prädiktiven Faktor gesetzt hatte, sind nicht erfüllt worden.

Bekannterweise ist die kardiale Sicherheit bei einer anti-HER2-gerichteten Therapie von besonderem Interesse. Die kardiale Sicherheit der Kombination beider Substanzen (Trastuzumab und Pertuzumab) wurde in der neoadjuvanten Tryphaena-Studie (Phase-II-Studie) an 225 HER2-positiven Patientinnen näher untersucht. Die vorgestellten Studienergebnisse ergaben eine niedrige Inzidenz von symptomatischer und asymptomatischer linksventrikulärer systolischer Dysfunktion (LVSD) sowie auch in Bezug auf einen Abfall der linksventrikulären Ejektionsfraktion (LVEF) keine wesentlichen Unterschiede zwischen den 3 Behandlungsgruppen A–C (Arm A: 3  $\times$  FEC + H + P gefolgt von 3  $\times$  Doc + H + P; Arm B: 3  $\times$  FEC gefolgt von Doc + H + P; Arm C: 6  $\times$  Docetaxel + Carboplatin + H + P) (**Abb. 1**) [30].

Zum Zeitpunkt der Präsentation hatten erst 16% der Studienpopulation den adjuvanten Teil der Behandlung abgeschlossen. In Bezug auf die Toxizitäten zeigten sich im Arm C insgesamt

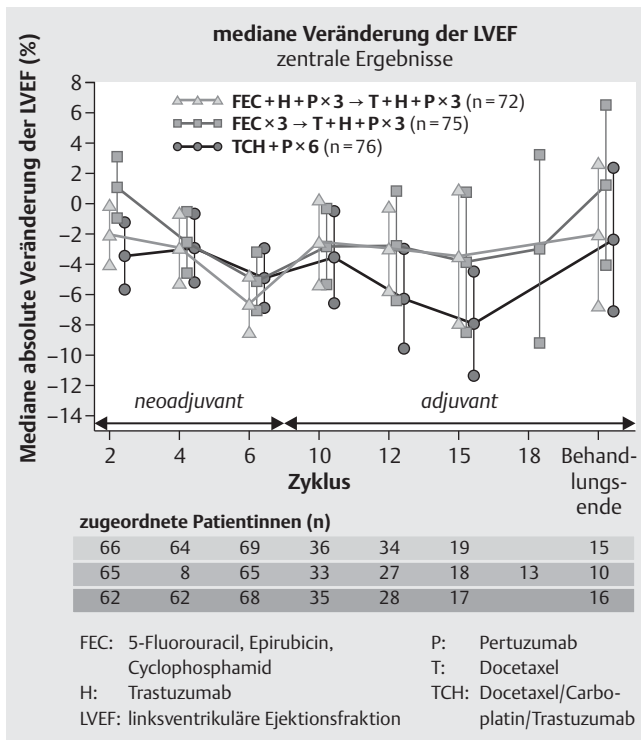

**Abb. 1** Tryphaena-Studie – mediane Veränderung der linksventrikulären Ejektionsfraktion (LVEF) der Behandlungsgruppen A–C (Arm A: 3 × FEC + H + P gefolgt von 3 × Doc + H + P; Arm B: 3 × FEC gefolgt von Doc + H + P; Arm C: 6 × Docetaxel + Carboplatin + H + P) [30].

mehr Grad-3- und höhere Toxizitäten, auch wenn die Unterschiede in Bezug auf die jeweiligen Symptome nicht groß erschienen. Die pCR-Rate ist Bestandteil der sekundären Studienziele dieser Studie, definiert als ypT0/is, d. h. In-situ-Residuen waren erlaubt. Hier konnten pCR-Raten von ca. 60% erreicht werden (Arm A: 61,6%, Arm B: 57,3%, Arm C: 66,2%). Insbesondere die Gruppe der hormonrezeptorpositiven Patientinnen, die ansonsten eher schlechtere pCR-Raten aufweist, profitiert von diesen Kombinationen mit pCR-Raten bis zu 50%. Ein weiteres Follow-up mit Überlebensdaten sowie die Auswertung der Biomarkerevaluation werden noch erwartet. Große Phase-III-Studien müssen letztendlich diese sehr guten und für die Patientinnen hoffnungsvollen Daten noch bestätigen. Die laufende Phase-III-Aphinity-Studie evaluiert bereits die duale Blockade in Kombination mit einer Standardchemotherapie in der adjuvanten Situation.

### Prognostische Bedeutung der pCR nach neoadjuvanter Chemotherapie

Bei triple-negativen Mammakarzinomen konnte schon vor einigen Jahren gezeigt werden, dass die Patientinnen mit einer pCR eine deutlich bessere Prognose aufweisen [31, 32]. Erst neuere Arbeiten konnten zeigen, dass dies auch für HER2-positive Mammakarzinome unter Trastuzumabtherapie der Fall ist [25]. Die Vielzahl der Patientinnen, die im Rahmen der Studien der AGO und der GBG eingeschleust wurden, ermöglicht heute die umfangreiche Analyse dieser Daten. In einer Metaanalyse wurden 4387 Patientinnen auf die Fragestellung hin untersucht, welche prognostische Bedeutung die pCR bei HER2-negativen Patientinnen mit Chemotherapiebehandlung im Vergleich zu HER2-positiven Patientinnen hat, die entweder neoadjuvant nur mit Chemo-

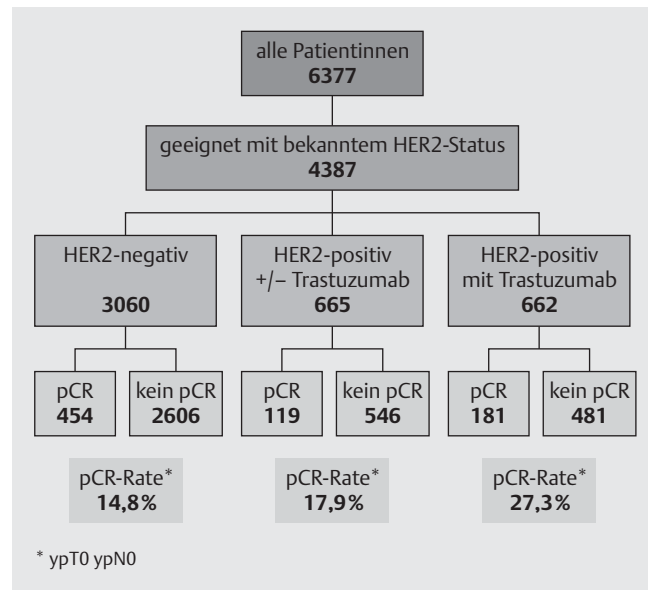

**Abb. 2** Vergleich des Überlebens in Abhängigkeit von der pathologischen kompletten Remission (pCR) in Patientinnen mit HER2-positiven Mammakarzinomen nach einer neoadjuvanten Chemotherapie mit oder ohne Trastuzumab verglichen mit Patientinnen mit HER2-negativen Mammakarzinomen [33].

therapie oder mit einer Kombination aus Chemotherapie und Trastuzumab behandelt wurden [33]. Es konnte gezeigt werden, dass allgemein Patientinnen mit HER2-positivem Mammakarzinom mit der Kombination von Trastuzumab und Chemotherapie eine höhere pCR-Rate (definiert als ypT0, ypN0) erreichen können als HER2-negative Patientinnen (27,3 vs. 14,8%) (● **Abb. 2**). Für alle 3 Subgruppen (HER2-negative, HER2-positiv mit und ohne Trastuzumab) zeigte sich im fernmetastasenfreien Überleben (DDFS) und Gesamtüberleben (OS) bei Erreichen einer pCR eine deutliche signifikante Verbesserung für die Patientinnen. Im Vergleich ist das OS mit der Hinzunahme von Trastuzumab bei HER2-positiven Patientinnen tendenziell besser ( $p=0,058$ ) als bei HER2-positiven Patientinnen, die kein Trastuzumab erhalten haben, und vergleichbar mit dem OS von HER2-negativen Patientinnen ( $p=0,134$ ). Insbesondere die HER2-positiven, hormonrezeptornegativen Patientinnen haben bei erfolgter Trastuzumabtherapie ein signifikant besseres DDFS ( $p=0,012$ ) erreicht im Vergleich zu den HER2-positiven Patientinnen, die kein Trastuzumab erhalten haben. Bezüglich des OS nach Hormonrezeptorstatus hat sich ein signifikanter Vorteil nur für die HER2-positiv, hormonrezeptornegative Subgruppe im Vergleich zu den HER2-negativen Patientinnen gezeigt ( $p=0,029$ ). Bei dieser Auswertung kann die pCR also als Surrogatmarker dienen. Gemäß dieser Metaanalyse haben Patientinnen, bei denen keine pCR erreicht werden konnte, in allen 3 Subgruppen ein signifikant höheres Risiko für ein Rezidiv der Erkrankung und eine schlechtere Prognose für das Gesamtüberleben, unabhängig davon, ob sie bei HER2-Positivität Trastuzumab erhalten haben oder nicht. Für diese Patientinnen wird dringend eine alternative Behandlung gesucht. Hier könnte die duale Blockade des HER2-Rezeptors eine Verbesserung erbringen.

## Molekulare Marker zur Identifikation von Therapieansprechen

Durch das neoadjuvante Studiendesign konnte in den letzten Jahren gelernt werden, welche Patientinnen eher auf eine Chemotherapie ansprechen und welche nicht. So haben hormonrezeptorpositive Patientinnen ein schlechteres Ansprechen als hormonrezeptornegative [26,31]. Auch haben Patientinnen mit einem höheren Grading und einer höheren Proliferationsrate ein besseres Ansprechen auf eine neoadjuvante Chemotherapie. Bei der Vielzahl möglicher Multigen-Tests für die Prognose bei Mammakarzinompatientinnen stellt sich natürlich die Frage, ob diese Tests nicht nur die Prognose, sondern auch das Therapieansprechen (prädiktiv) vorhersagen können. Eine Studie hat kürzlich Ergebnisse diesbezüglich vorgestellt [34]. Bei neoadjuvant behandelten Patientinnen wurde der sogenannte PAM50-Risikoscore untersucht. Dieser Score berechnet sich aus Genexpressionswerten von 50 Genen und ist in der Lage, eine sog. HER2-enriched (HER2-E) Subgruppe innerhalb der klinisch HER2-positiven Tumoren zu definieren, die nicht mit den klassischen Markern (IHC, FISH) bestimmt werden kann. Zwei unabhängige Patientinnengruppen wurden untersucht: einmal 67 Patientinnen, die eine neoadjuvante, anthrazyklin- und taxanhaltige Chemotherapie ohne Trastuzumab erhielten, und 27 Patientinnen aus der sogenannten XeNA-Studie, die neoadjuvant mit einer kombinierten Therapie aus Trastuzumab + Docetaxel/Capecitabin (ohne Anthrazyklone) behandelt wurden. Klinisch HER2-positiv und PAM50-HER2-E-Tumoren erreichen höhere pCR-Raten mit beiden genannten Therapieregimen [34]. Zur Bestätigung der möglicherweise prädiktiven Rolle der PAM50-HER2-E-Unterscheidung werden Studien mit größeren Fallzahlen benötigt. Eine Erklärung für den möglicherweise prädiktiven Wert dieser Gensignatur bezüglich trastuzumabhaltiger Regime besteht darin, dass Tumoren mit sowohl klinisch HER2-positivem als auch PAM50-HER2-E-Status eine Aktivierung des EGFR-HER2-Signalwegs zeigen.

## Vorgehen bei Nichtansprechen auf eine neoadjuvante Chemotherapie

Während der neoadjuvanten Therapie kann durch bildgebende Verfahren wie Mammografie oder Ultraschall das Ansprechen des Tumors auf die Therapie überprüft werden. Meistens haben Patientinnen, die bei einer Überprüfung kein Ansprechen zeigen, dann auch keine pCR zum Zeitpunkt der Operation. Deswegen stellt sich die Frage, ob man bei diesen Patientinnen eine Verbesserung des Therapieansprechens und der Prognose erreichen kann, wenn man die Therapie bei Nichtansprechen durch den Einsatz von Substanzen mit einer anderen Wirkweise verändert. Die GeparTrio-Studie war eine der ersten Studien, die dies prospektiv in einer großen Studie untersucht hat. Nach sonografischer Beurteilung des Ansprechens der neoadjuvanten Chemotherapie nach 2 Zyklen TAC konnten die Patientinnen in sog. Responder (definiert als Größenreduktion um mindestens 50% der primären Tumorgroße) und Non-Responder unterteilt werden. Patientinnen mit Partial- oder Komplettremission haben eine Therapieintensivierung durch die Hinzunahme von 2 Therapiezyklen mit insgesamt 8 × TAC und die Patientinnen mit No-Change-Situation nach 2 × TAC als experimentellen Arm den Wechsel auf ein mutmaßlich nicht kreuzresistentes Regime mit 4 × NX (Vinorelbin 25 mg/m<sup>2</sup> d1+8 i.v. q3w + Capecitabin 1000 mg/m<sup>2</sup> 2 × tgl. d1–14 p.o. q3w) erhalten. Sowohl in der Responder- als auch in der Non-Responder-Gruppe war ein Standardarm mit insgesamt 6 × TAC zum Vergleich integriert [35].

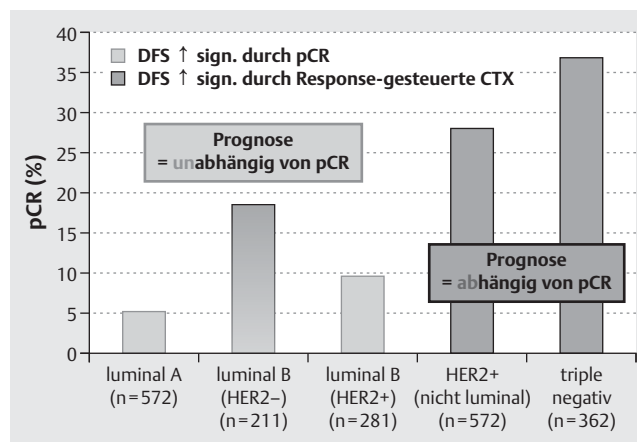

Abb. 3 GeparTrio-Analyse: pCR-Rate nach Subtypen ergänzt nach von Minckwitz G et al. [77].

Die pCR-Raten (definiert als ypT0, ypN0) als primärer Endpunkt haben beim Vergleich des Standardarms mit 6 × TAC zur verlängerten Therapie mit 8 × TAC keinen signifikanten Unterschied ergeben ( $p = 0,27$ ) [35]. Gleiches wurde auch bei den Non-Respondern bezüglich 6 × TAC im Vergleich zu 2 × TAC gefolgt von 4 × NX beobachtet ( $p = 0,73$ ). Die kürzlich vorgestellte Analyse der sekundären Endpunkte krankheitsfreies Überleben (DFS) und OS zeigte jedoch einen signifikanten Unterschied zwischen den konventionell behandelten Patientinnen mit 6 × TAC und den sog. Response-gesteuert behandelten Patientinnen (Umstellung je nach Ansprechen auf längeren Arm mit 8 × TAC für Responder oder andere Medikamente (Vinorelbin/Capecitabin) für Non-Responder (DFS: HR 0,71; 95%-KI: 0,6–0,85;  $p < 0,001$ ; OS: HR 0,79; 95%-KI: 0,63–0,99;  $p = 0,048$ ).

Innerhalb der Responder-Gruppe ist die verlängerte TAC-Gabe für das DFS signifikant besser ausgefallen (HR 0,78; 95%-KI: 0,62–0,97;  $p = 0,026$ ), und bei den Non-Respondern verbesserte sich das DFS ebenfalls signifikant durch die Umstellung auf eine nicht kreuzresistente Chemotherapie (NX) (HR 0,59; 95%-KI: 0,49–0,82;  $p = 0,001$ ). In der Subgruppenanalyse zeigt sich hier, dass der Effekt im DFS der Response-gesteuerten Therapie von den luminalen Tumoren definiert gemäß den aktuellen St.-Gallen-Kriterien (HR-positiv, HER2-positiv oder -negativ) [36] ausgeht (HR 0,40–0,56) (● Abb. 3). Hier hat die Therapieumstellung nach 2 × TAC und nicht ausreichendem Ansprechen einen positiven Effekt ergeben, wohingegen für die triple-negativen oder HER2-positiven nicht luminalen Tumoren keine Verbesserung des DFS durch die Response-gesteuerte Therapie erzielt werden konnte (HR 1,01; 95%-KI: 0,61–1,67 und HR 0,87; 95%-KI: 0,61–1,25).

Auch die aktuellere GeparQuinto-Studie der AGO- und GBG-Studiengruppen wurde designed, um bei Nichtansprechen von Patientinnen mit einem HER2-negativen Tumor auf eine neoadjuvante anthrazyklinbasierte Therapie ( $\pm$  Bevacizumab) zu überprüfen, ob durch eine Therapieumstellung ein Ansprechen erzielt werden kann. Die Ergebnisse der Hauptstudie, die die Hinzunahme von Bevacizumab zur anthrazyklin- und taxanbasierten neoadjuvanten Chemotherapie geprüft hat, sind kürzlich publiziert worden [23,24] und zeigten, dass die pCR durch die Hinzunahme von Bevacizumab von 14,9% (95%-KI: 12,5–17,3%) auf 18,4% (95%-KI: 16,0–21,0%) gesteigert werden konnte (Odds Ratio 1,29; 95%-KI: 1,02–1,65;  $p = 0,04$ ) [23,37].

**Tab. 2** Vergleich von adjuvanten Therapiestudien mit Bisphosphonaten in unterschiedlichen Patientenkollektiven.

| Studie                             | n    | Patientinnen-<br>beschreibung | CHT  | Bisphosphonattherapie                        | medianes FU | HR für DFS           | HF für OS            | Referenz            |
|------------------------------------|------|-------------------------------|------|----------------------------------------------|-------------|----------------------|----------------------|---------------------|
| AZURE alle Patientinnen            | 3360 | Stadien II/III                | 95%  | Zoledronat 4 mg, 6 × q3–4w, 8 × q3m, 5 × q6m | 60 m        | 0,98<br>(p = 0,79)   | 1,01<br>(p = 0,93)   | Coleman, 2011 [42]  |
| AZURE postmenopausale Patientinnen | 1101 | Stadien II/III postmenopausal | 95%  | Zoledronat 4 mg, 6 × q3–4w, 8 × q3m, 5 × q6m | 60 m        | 0,71<br>(p = 0,0017) | 0,71<br>(p = 0,017)  | Coleman, 2011 [42]  |
| ABCSG-12                           | 1803 | prämenopausal                 | < 5% | Zoledronat 4 mg, 6 × q6m                     | 84 m        | 0,72<br>(p = 0,014)  | 0,63<br>(p = 0,0049) | Gnant, 2009 [41]    |
| ZOFAST                             | 1065 | postmenopausal                | 0%   | Zoledronat 4 mg, 6 × q6m                     | 60 m        | 0,66<br>(p = 0,0375) | n. s.                | de Boer, 2011 [28]  |
| NSABP-B34                          | 3323 | alle Stadien                  | 65%  | Clodronat 1600 mg/d über 5 Jahre             | 101 m       | 0,91<br>(p = 0,27)   | 0,84<br>(p = 0,13)   | Paterson, 2011 [32] |
| Powles                             | 1069 | alle Stadien                  | ?    | Clodronat 1600 mg/d über 2 Jahre             | 88 m        | 0,77<br>(p = 0,127)  | 0,77<br>(p = 0,047)  | Powles, 2002 [44]   |
| Diel                               | 302  | DTC im KM                     | 40%  | Clodronat 1600 mg/d über 2 Jahre             | 103 m       | 0,98<br>(p = 0,222)  | 0,83<br>(p = 0,049)  | Diel, 2008 [43]     |
| Sarto                              | 296  | nodal positiv                 | 90%  | Clodronat 1600 mg/d über 2 Jahre             | 98 m        | n. s.                | n. s.                |                     |

Für die Patientinnen, die nicht auf die neoadjuvante Therapie mit 4 × EC ± Bevacizumab angesprochen hatten, wurde die Therapie-strategie geändert und nun 4 Zyklen Paclitaxel (Pw) 80 mg<sup>2</sup> d1 + 8 q3w ± RAD001 (5 mg/d ab Tag 13 nach Start mit Dosiseskala-tion von 2,5 mg bis 5 mg/Tag appliziert). Insgesamt wurden 395 Patientinnen in diese Non-Responder-Arme der Studie einge-schlossen.

Die Hinzunahme von RAD001 zu 12 Wochen Paclitaxel hat die pCR-Rate (definiert als primärer Endpunkt mit ypT0, ypN0) bei signifikant gesteigerter Toxizität für alle Symptome nicht verbes-sern können (Pw 5,6% vs. Pw + RAD001 3,6%; p = 0,476) [38]. Die pCR könnte jedoch der falsche Marker für den Effekt von RAD001 sein. DFS- und OS-Daten müssen hier noch abgewartet werden. Ein großes Biomarker-Programm für die Identifikation von mög-lichen prädiktiven Markern läuft.

### Adjuvante Therapie

Nachdem die letzten Jahre durch eine Fülle von klassischen Che-motherapiestudien, den Vergleichsstudien zwischen Aromatase-hemmern und Tamoxifen und den adjuvanten Trastuzumabstuden geprägt war, fanden sich in den letzten 12 Monaten kaum noch vergleichbare Studien, die sich mit dem reinen Vergleich von Therapiearmen in diesem Studiendesign beschäftigen haben. Das Augenmerk richtet sich nunmehr auf andere Substanzklas-sen und molekularen Tests, die das Ansprechen auf die etablier-ten Substanzen testen sollen. Eine dieser Substanzgruppe ist die der Bisphosphonate, die für die Behandlung der Osteoporose und von Knochenmetastasen zugelassen ist, und die in der Diskussion stehen, ob sie oder für welche Patientinnengruppen sie die Prog-nose auch in der adjuvanten Situation verbessern können (● Tab. 2). Die Zusammenhänge zwischen der weiblichen Brust, der Erkrankung Brustkrebs und der Knochengesundheit sind nicht nur durch klinische Studien, sondern durch eine Fülle von präklinischen und klinischen Arbeiten in den Blickpunkt des In-teresses gerückt.

In einem Update der ABCSG-12-Studie [39], welche den Einsatz des Zoledronats (4 mg, q6m über 3 Jahre) bei prämenopausalen Patientinnen (n = 1803) mit hormorezeptorpositiven Tumoren

untersuchte, die als adjuvante endokrine Therapie GnRH-Analo-gon plus Tamoxifen oder Anastrozol erhielten [40]. Die mediane Follow-up-Zeit beträgt nun 84 Monate. Weiterhin ist das DFS besser in dem Zoledronatarm gegenüber dem Kontrollarm (HR 0,72 [0,56–0,94]; p = 0,014). Besonders nodalpositive und Pa-tientinnen über 40 Jahren profitierten. Der Effekt war sowohl in der mit Anastrozol als auch in der mit Tamoxifen behandelten Gruppe vorhanden. Interessanterweise zeigt sich mittlerweile auch eine signifikante Verbesserung des Gesamtüberlebens zu-gunsten der mit Zoledonate behandelten Gruppe (HR 0,63; 95%-KI: 0,40–0,99; p = 0,049), die wiederum vor allem durch Patien-tinnen > 40 Jahre hervorgerufen wird. In dieser Dosierung zeigten sich keine schweren Nebenwirkungen (Osteokiefernekrosen, Nierentoxizität).

Die ZOFAST-Studie untersuchte den protektiven Effekt von Zole-dronat (4 mg, q6m, über 5 Jahre) auf die Knochendichte postmenopausaler Patientinnen und erfasste sekundär auch die Rezi-dive und das Gesamtüberleben (n = 1065) [41]. Nach einem me-dianen Follow-up von 60 Monaten zeigt sich weiterhin eine ver-besserte Knochendichte in der a priori behandelten gegenüber der bei gegebener Indikation behandelten Gruppe. Das DFS war ebenfalls besser in der a priori behandelten Gruppe (HR 0,66; p = 0,0375), was vor allem auf Patientinnen zurückzuführen war, die sich schon länger in der Menopause befanden.

Jedoch muss hier weiterhin betont werden, dass in der letztes Jahr vorgestellten AZURE-Studie eine intensivierte adjuvante Zo-ledronattherapie über 5 Jahre in der Gesamtgruppe (n = 3360) nicht zu einem verbesserten DFS geführt hatte. Nur in der Gruppe der sicher postmenopausalen Patientinnen (n = 1100) wurde ein signifikanter Vorteil erzielt [42].

Auch für das Clodronat ist bereits aus 2 Studien bekannt, dass Clodronat (1600 mg/d über 2 Jahre) das Gesamtüberleben primä-erer Brustkrebspatientinnen verbessern kann [43,44]. Die NSABP-B34-Studie ist eine weitere Studie, welche dieselbe Fra-gstellung hatte. Insgesamt 3323 primäre Brustkrebspatientin-nen aller Stadien wurden mit 1600 mg Clodronat pro Tag über 3 Jahre oder Placebo behandelt [45]. Nach 8,4 Jahren Follow-up zeigte sich kein Unterschied im DFS (HR 0,91; 95%-KI: 0,78–1,07; p = 0,27) oder OS (0,84; 95%-KI: 0,67–1,05; p = 0,13). Ältere Pa-tientinnen profitierten zwar mehr, jedoch nur bezüglich des

rückfallfreien Überlebens und des knochenmetastasenfreien Überlebens. Relativierend muss gesagt werden, dass die Compliance in beiden Gruppen der Patientinnen sehr schlecht war (ca. 60% nach 2 Jahren). Ob in dieser Studie Patientinnen der Placebogruppe auf der Basis der publizierten ABCSG-12- und ZOFASST-Studie „heimlich“ Zoledronat erhalten hatten, ist nicht bekannt. Im Rahmen der GAIN-Studie wurde Ibandronat mit Epirubicin, Paclitaxel und Cyclophosphamid mit der Hypothese kombiniert, dass das Bisphosphonat die Behandlungserfolge beim primären Mammakarzinom weiter verbessern könnte. Es zeigte sich kein signifikanter Unterschied, bezogen auf das krankheitsfreie Überleben und Gesamtüberleben in Patientinnen mit oder ohne Ibandronat [46]. Analog zur NSABP-B34-Studie scheinen ältere Patientinnen mehr als jüngere von Ibandronat zu profitieren, allerdings konnte hier keine Signifikanz gezeigt werden.

### Finale Analyse der ADEBAR-Studie

Aktuell ist noch zu klären, ob Patientinnen mit mehr als 3 befallenen Lymphknoten von einer zusätzlichen Taxangabe im Rahmen ihrer adjuvanten Therapie profitieren. Des Weiteren bedarf es weiterer Evidenz zur optimalen zeitlichen Abstimmung der Taxantherapie, entweder simultan zur Anthrazyklintherapie oder sequenziell nachfolgend. Janni et al. stellten die finale Datenanalyse der deutschen multizentrischen ADEBAR-Phase-III-Studie vor. Patientinnen mit primärem Mammakarzinom und mehr als 3 befallenen Lymphknoten erhielten entweder eine rein anthrazyklinhaltige Chemotherapie nach dem kanadischen FEC120-Schema (6 Zyklen mit Epirubicin 60 mg/m<sup>2</sup> d1 + d8, 5-FU 500 mg/m<sup>2</sup> d1 + 8, C 75 mg/m<sup>2</sup> d1–14, q4w) oder eine sequenzielle anthrazyklin-taxanhaltige Chemotherapie EC-D (4 Zyklen Epirubicin 90 mg/m<sup>2</sup> und Cyclophosphamid 600 mg/m<sup>2</sup> q21 gefolgt von 4 Zyklen Doxetacel 100 mg/m<sup>2</sup> q21). Es zeigte sich kein Unterschied hinsichtlich des rezidivfreien und Gesamtüberlebens. Allerdings wiesen die Patientinnen unter einer sequenziellen anthrazyklin-taxanhaltigen Therapie deutlich weniger hämatologische Toxizitäten auf, brachen seltener die Therapie ab (3,7 vs. 8,0%) und benötigten weniger Antibiotika (10,4 vs. 19,7%) und Wachstumsfaktoren in Form von G-CSF (39,2 vs. 61,4%) [47]. Eine anthrazyklin-taxanhaltige Therapie ist gegenüber einer ausreichend dosierten anthrazyklinhaltigen Chemotherapie äquieffektiv (Epirubicin mit 120 mg/m<sup>2</sup> dosiert!). Jedoch ist diese signifikant mit weniger hämatologischen Toxizitäten assoziiert. Bezüglich der Langzeittoxizität (z.B. Zweitmalignome, Kardiotoxizität) liegen noch keine vergleichenden Daten vor. Diese wird aber ebenfalls tendenziell zugunsten der sequenziellen anthrazyklin-taxanhaltigen Therapie ausfallen.

### Effekt von Darbepoetin-α auf die Effektivität einer Chemotherapie

Darbepoetin-α wird derzeit eingesetzt, um eine chemotherapie-assoziierte Anämie zu vermeiden. Dennoch wird immer wieder berichtet, dass der Einsatz von Hämatopoese stimulierenden Faktoren einen negativen Einfluss auf die Prognose von Mammakarzinompatientinnen haben könnte. Auch wenn der Unterschied in der PREPARE-Studie [48, 49], welche Patientinnen, die neoadjuvant mit einer Chemotherapie behandelt wurden und für eine Therapie mit Darbepoetin randomisiert wurden, in Bezug auf das Disease free Survival nicht signifikant unterschiedlich war, so war die schlechtere Prognose im Darbepoetin-Arm zumindest suggestiv. Im Rahmen des WSG-ARA-Trials wurde prospektiv der Einfluss von Darbepoetin-α in einem High-Risk-Kollektiv evaluiert. Patientinnen erhielten entweder eine Che-

motherapie mit 6 × T<sub>75</sub>A<sub>50</sub>C<sub>500</sub> q3w oder 6 × F<sub>500</sub>E<sub>100</sub>C<sub>500</sub> q3w. Die Gabe von Darbepoetin-α erfolgte randomisiert (ARA+/ARA-). In der ARA+-Gruppe wurde der Einsatz von Darbepoetin-α bei einem Hb von 13 mg/dl begonnen und bis zu einem Hb von 14 mg/dl fortgesetzt bis maximal zum Abschluss der adjuvanten Radiotherapie. Insgesamt wurden 1234 Patientinnen eingeschlossen. Sowohl das Event-freie Überleben (ARA+/ARA-: 89,2 vs. 87,6%) als auch das Gesamtüberleben (95,4 vs. 95,1%) wurde nach einem medianen Follow-up von 40 Monaten nicht durch die Gabe von Darbepoetin-α beeinflusst [50]. Die Gabe von Darbepoetin-α zur Vermeidung einer chemotherapieinduzierten Anämie scheint basierend auf den Daten des WSG-ARA-Trials sicher zu sein. Allerdings können die Daten nicht auf die neoadjuvante Situation übertragen werden. Im Rahmen der neoadjuvanten PREPARE-Studie konnte ein negativer Effekt auf das rezidivfreie Überleben bei mit Darbepoetin-α behandelten Patientinnen gesehen werden [48, 49].

### Lapatinib in der Adjuvanz – die TEACH-Studie

In der adjuvanten Situation erhalten mittlerweile alle HER2-positiven Mammakarzinompatientinnen mit adjuvanter Chemotherapie routinemäßig 1 Jahr Trastuzumab. Der adjuvante Stellenwert von Lapatinib ist derzeit noch unklar und wird u. a. im Rahmen der randomisierten, multizentrischen, placebokontrollierten TEACH-Studie evaluiert. Die ersten Überlebensdaten wurden nun von Paul Goss [51] vorgestellt.

In die TEACH-Studie konnte HER2-positive primäre Mammakarzinompatientinnen, die z. B. aufgrund des Zulassungsstatus initial kein adjuvantes Trastuzumab erhalten hatten, eingeschlossen werden. Die Chemotherapie konnte mehrere Jahre zurückliegen. 3147 Patientinnen wurden insgesamt randomisiert. Das mediane Follow-up betrug 4 Jahre. Zwar konnte das Rezidivrisiko durch die adjuvante Gabe von Lapatinib um 17% reduziert werden, jedoch hatte Lapatinib keine statistisch signifikante Auswirkung auf das rezidivfreie und Gesamtüberleben [51]. In der Subgruppenanalyse konnte allerdings für hormonrezeptornegative Patientinnen sowie für Patientinnen, die innerhalb eines Jahres der Diagnosestellung Lapatinib erhalten hatten, ein signifikanter Benefit nachgewiesen werden. Dies galt auch für die Patientinnen, deren HER2-Status zentral bestimmt wurde. Die häufigsten Nebenwirkungen der adjuvanten Lapatinibtherapie waren Diarrhö (61%) und Hautausschläge (59%).

Die adjuvante Therapie mit Lapatinib kann eine wichtige Alternative bei Kontraindikationen zu Trastuzumab sein. Insbesondere die Patientinnen, die zeitnah Lapatinib erhalten hatten, profitierten deutlich von dieser Therapie, wenn auch nicht die Effektivität von Trastuzumab erreicht werden konnte. Der alleinige und kombinierte Einsatz von Lapatinib und Trastuzumab im adjuvanten Setting wird derzeit auch in der ALTTO-Studie ([www.clinicaltrials.gov/ct/show/NCT00490139](http://www.clinicaltrials.gov/ct/show/NCT00490139)) untersucht. Die ersten Überlebensdaten werden für 2013 erwartet.

### Die Behandlung der metastasierten Patientin

Neue Therapieschemata und neue Substanzen zur Behandlung von Patientinnen mit Mammakarzinom finden ihren Weg in die Klinik oftmals zuerst in der metastasierten Situation, weil bei diesen Patientinnen oftmals die Phase-II-Studien und die Zulassungsstudien durchgeführt werden. In den letzten Jahren wurde eine Vielzahl von Medikamenten entwickelt mit dem Gedanken, dass diese gezielt für den Tumor bedeutsame Signalwege blockie-





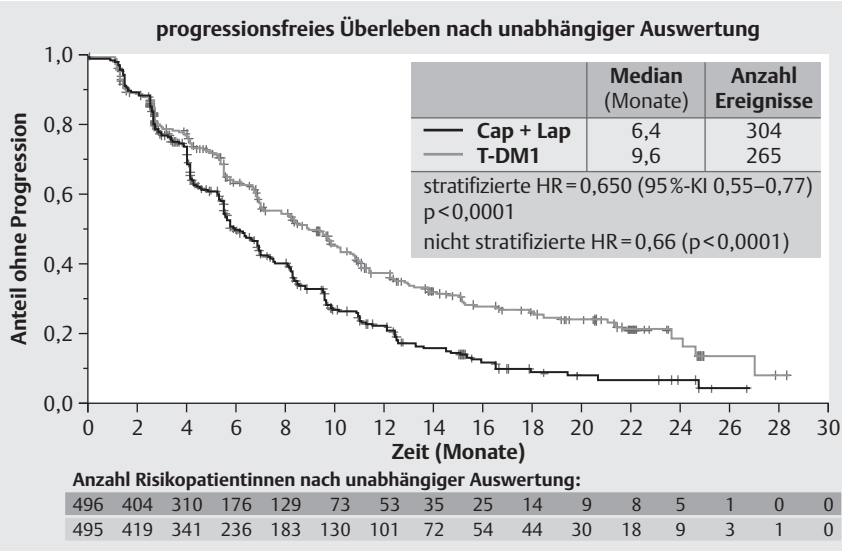

**Abb. 5** Progressionsfreies Überleben in der EMILIA-Studie. Adaptiert nach Blackwell et al. [55].

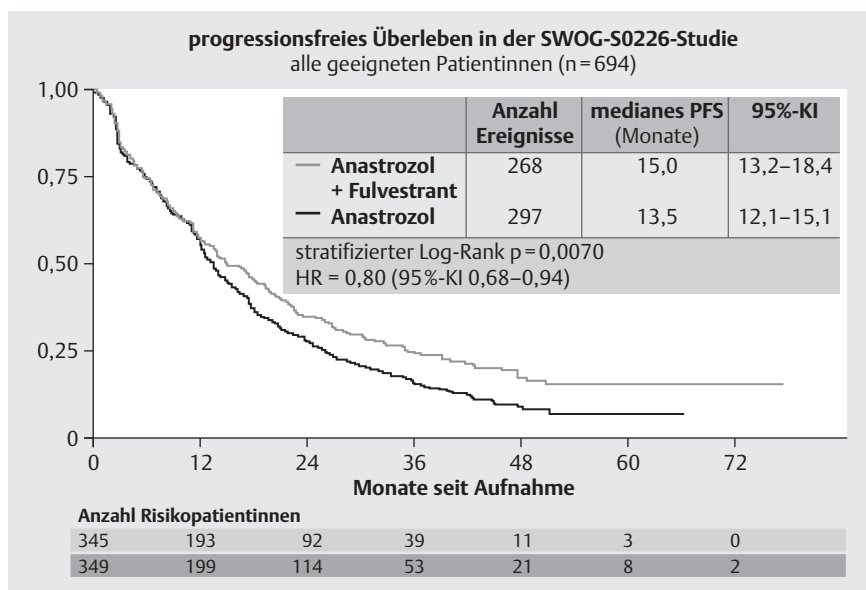

**Abb. 6** SWOG-S0226-Studie – Auswertung des primären Endpunkts progressionsfreies Überleben. Adaptiert nach Mehta et al. [62].

und PIK3CA eine Schlüsselrolle zu spielen schienen. Sowohl die Einteilung von HER2-positiven Patientinnen in prognostische Gruppen als auch die Resistenz gegen eine Anti-HER2-Therapie scheinen mit der Wirkweise dieser Proteine verbunden zu sein. Unter einer Behandlung mit Paclitaxel ± Lapatinib wurden Mutationen im Gen PIK3CA untersucht. In 30,1% der Fälle fand sich eine genetische Veränderung, die für die Patientinnen mit einem statistisch signifikant schlechteren Gesamtüberleben einherging [56]. Gleichmaßen wurde ein Trend sichtbar, dass gerade diese HER2-positiven Patientinnen von der Zugabe von Lapatinib durch ein verbessertes progressionsfreies Überleben profitieren. Die Therapie mit Lapatinib zuzüglich zu Paclitaxel war in dieser Studie mit 444 Patientinnen zudem unabhängig von PTEN-Mutationen mit einem verlängerten PFS assoziiert, welches sich aber nur in der Gruppe mit PTEN-Verlust (12,4% aller Patientinnen) in ein verbessertes Gesamtüberleben übersetzte.

Auch beim hormonrezeptorpositiven Mammakarzinom konnten in letzter Zeit Fortschritte berichtet werden. Bereits letztes Jahr konnte durch eine Langzeituntersuchung erstmals ein Gesamt-

überlebensvorteil von Aromatasehemmern in der adjuvanten Situation der Behandlung des postmenopausalen Mammakarzinoms gezeigt werden [57]. Die Weiterentwicklung der anti-hormonellen Therapie in der Post-Aromatasehemmer-Ära hatte versucht, den Östrogenrezeptorantagonisten Fulvestrant in Kombination mit Aromatasehemmern zu etablieren, was sich in einigen Studien als schwierig dargestellt hatte [58–61]. In der 2011 auf dem SABCS vorgestellten SWOG-S0226-Studie, welche die Kombination von Anastrozol und Fulvestrant vs. Anastrozol alleine beim metastasierten Mammakarzinom testete, zeigte sich jedoch überraschenderweise ein signifikanter Unterschied sowohl beim progressionsfreien (HR 0,8, 95%-KI: 0,68–0,94; p = 0,007, **Abb. 6**), vor allem aber auch beim Gesamtüberleben (HR 0,81; 95%-KI: 0,65–1,00; p = 0,049) [62]. Dieser Erfolg wurde aber fast ausschließlich bei den Patientinnen erzielt, die vorher noch kein Tamoxifen erhalten hatten. Die klinische Anwendbarkeit dieses Ergebnisses beschränkt sich damit im Wesentlichen auf Patientinnen, bei denen eine Hormonempfindlichkeit des Tumors, etwa im Rahmen einer Metastasenbiopsie, neu festgestellt wurde.



und insbesondere das letzte Lebensjahr. Bei den Patientinnen unter dem 65. Lebensjahr lagen diese bei 27 700, 2200 und 94 300 \$ pro Jahr ( $\geq 65$ . Lebensjahr: 23 000, 2200 und 62 900) [67]. Die Kosten der initialen Phase verteilen sich auf unterschiedliche Therapien. Die Operation gehört hier eher zu den kostengünstigsten Optionen (► **Tab. 3**). Unter dem Aspekt ist es schwer nachvollziehbar, dass die Krankenkassen bzw. der Medizinische Dienst der Krankenkassen gerade bei den stationären Verweildauern der operativen Therapie hart verhandeln und jeden aus ihrer Sicht nicht klar rechtfertigbaren stationären Tag streichen. Auch aus Europa liegen aktuelle Daten zu den Kosten von Patientinnen mit einem Mammakarzinom vor. In einer französischen Studie wurden retrospektiv die Kosten von 437 Chemotherapiezyklen in der adjuvanten Therapiesituation ausgewertet [68]. Hier lagen die durchschnittlichen Kosten pro Zyklus bei 1752 € und für die gesamte Chemotherapie bei 13 593 €. Jedoch muss auch die soziale Perspektive einer Therapie durch Ausfall am Arbeitsplatz berücksichtigt werden; es entstehen Kosten von 15 740 € pro Patientin.

In der metastasierten Therapiesituation liegen die Kosten einer spezialisierten Behandlung höher, wie am Beispiel der HER2-positiven, hirnmetastasierten Patientin klar wird [69]. Mit Blick auf den zeitlichen Verlauf fielen 19 402 € Therapiekosten für die Monate 0–6, 17 379 € für die Monate 7–12, 15 337 € für die Monate 13–18 und 14 679 € für die Monate 19–24 an. Kostenberechnungen in den unterschiedlichen Therapiesituationen sind insgesamt jedoch noch selten, stellen aber die Grundlage jeder gesundheitsökonomischen Evaluation dar, und sollten länderspezifisch weiter forciert werden.

Dass die Kosten der Systemtherapie deutlich gestiegen sind, wird beim Vergleich der Zulassung von neuen Medikamenten deutlich (LIT ELKIN). Während Tamoxifen bei Markteintritt einen Preis von 100 \$/Monat hatte, liegen nun die Preise neu zugelassener Medikamente deutlich höher, wie z. B. Nab-Paclitaxel mit über 7500 \$ pro Monat. Zudem erhalten auch mehr Patientinnen Systemtherapien über einen immer länger werdenden Zeitraum.

Während aktuell in den USA 15 Mrd. US \$/Jahr für die Therapie des Mammakarzinoms ausgegeben werden, wird es rechnerisch im Jahre 2020 bei fast 25 Mrd. US \$ liegen – dieses ohne Berücksichtigung der Inflation, welche die Kosten weiter in die Höhe treibt.

Kosten-Nutzwert-Analysen, welche die pro Therapie gewonnene Lebensqualität mit einbeziehen, könnten helfen, die Ressourcen besser zu verteilen und die Ausgaben zu planen. Anhand der qualitätsadjustierten Lebensjahre (QALYs) können folgend erzielte Vorteile unterschiedlicher Therapien im Vergleich zu den notwendigen Kosten vergleichbar gemacht werden. Momentan gibt es in Deutschland keine klaren Richtwerte für die pro gewonnenem Lebensqualität-adjustierten Lebensjahr akzeptierten Kosten. In den USA wird ein Preis von < 50 000 \$ pro QALY als günstig angesehen. Während Kosten von über 100 000 \$ pro QALY sehr hoch bewertet werden, und einer genauen klinischen Rechtfertigung bedürfen, können Kosten zwischen 50 000 \$ und 100 000 \$ nach Belegung des Benefits beurteilt werden.

Der Wert der Kosten-Nutzwert-Berechnung kann anhand von Beispielen verdeutlicht werden. Wenn zum Beispiel Ixabepilone zu Capecitabin bei Patientinnen mit einem anthrazyklin- und taxanresistenten Mammakarzinom hinzugefügt wird, so fallen bei 5 Zyklen zusätzliche Kosten von 21 000 \$ an. Anhand der Berechnung der QALYs entstehen Kosten von 360 000 \$ pro QALY [70] – hier wird eine Beurteilung des Kosten-Nutzens schon deutlich transparenter. Weitere Beispiele sind in ► **Tab. 4** aufgeführt. Es

**Tab. 3** Kosten der initialen Phase (2002, in US \$) [76].

|                                | Prozentsatz mit Erhalt der Therapieform | Durchschnittliche Kosten für Patientinnen mit Therapie |
|--------------------------------|-----------------------------------------|--------------------------------------------------------|
| gesamt                         | 100%                                    | 21 000 \$                                              |
| Operation                      | 91%                                     | 5 700 \$                                               |
| Chemotherapie                  | 24%                                     | 12 800 \$                                              |
| Bestrahlung                    | 51%                                     | 4 500 \$                                               |
| weitere stationäre Aufenthalte | 23%                                     | 16 700 \$                                              |

**Tab. 4** QALYs in der Therapie des Mammakarzinoms (2010, in US \$) [66].

| Intervention                                                                         | inkrementelle Kosteneffektivitäts-Ratio (ICER) |
|--------------------------------------------------------------------------------------|------------------------------------------------|
| BRCA-1/2-Test (Alter $\geq 35$ ; familiäre Anamnese)                                 | 5 400 \$/QALY                                  |
| Raloxifen zur Risikoreduktion (Alter 55)                                             | 22 000 \$/QALY                                 |
| Letrozol vs. Anastrozol (postmenopausal, HR+)                                        | 26 000 \$/QALY                                 |
| Lapatinib plus Capecitabin vs. Capecitabin                                           | 170 000 \$/QALY                                |
| jährliches Screening mittels MRT vs. Mammografie (BRCA1)                             | 210 000 \$/QALY                                |
| Bevacizumab plus Paclitaxel vs. Paclitaxel                                           | 280 000 \$/QALY                                |
| partielle Brustbestrahlung vs. Ganzbrustbestrahlung (Stadium I, ER+, postmenopausal) | 730 000 \$/QALY                                |
| digitales Mammografiescreening vs. Film (Alter $\geq 40$ )                           | 930 000 \$/QALY                                |

ist aber klar, dass Kosten-Nutzwert-Analysen nie eine alleinige Grundlage für Entscheidungen darstellen sollen, jedoch als weitere Informationsquelle Entscheidungen deutlich zu unterstützen vermögen.

Die steigenden Pro-Kopf-Ausgaben betreffen nicht nur – wie oben dargestellt – Deutschland, sondern auch insbesondere die USA. Während in den USA die Pro-Kopf-Ausgaben im Gesundheitssystem im Jahre 1990 bei 2814 \$ lagen, sind es aktuell 8047 \$. Für das Jahr 2019 werden Kosten von 13 387 \$ pro Kopf und Jahr erwartet [71]. Die hohen Kosten entsprechen jedoch häufig nicht dem erzielten Benefit – auch in der Senologie. Eine Auswertung der SEER/Medicare-Datenbank in Bezug auf die Brustkrebsmortalität und die Therapiekosten von 99 Regionen zeigte, dass bei Kosten von 17 315 \$ ein 5-Jahres-Überleben von 88% erreicht werden konnte. Bei Kosten von 26 808 \$ lag das 5-Jahres-Überleben auch bei 88%.

Auch in den USA werden Lösungsmöglichkeiten der Kostenbegrenzung gesucht. Eine Option sind Festbeträge (National Coverage Determination), welche jedoch auch Risiken bergen, z. B. die Änderung des Verschreibungsverhaltens. So zeigte sich nach Einführung von Festbeträgen im Jahre 2005 ein massiver Abfall des Docetaxelverbrauchs. Dieses ist natürlich auch für Deutschland bedeutend, welches Festbeträge für Medikamente seit Jahren festlegt und dieses im aktuellen Arzneimittelverordnungs-gesetz (AMNOG) vom 1.1.2011 weiter forciert.

Wer sollte nun Entscheidungsträger über die Kosten im Gesundheitswesen sein? Wenn die Gesellschaft bzw. die Regierung entscheidet, können Kosten zwar an die verfügbaren Ressourcen angepasst und gleichmäßig verteilt werden, aber Patientinnen und Ärztinnen und Ärzten hätten weniger Optionen. Wenn Patientin-

nen über Kosten entscheiden könnten, wären mehr Optionen zur Verfügung, jedoch wäre der administrative Aufwand zu hoch und es würde sich die Frage stellen, ob hier die Informationsgrundlage für Entscheidungen vorhanden ist (Kaskett, SABCS, 2011). Auch die Entscheidung den Kostenträgern zu überlassen ist kritisch, da hier Restriktionen zu befürchten wären. In einer aktuellen Arbeit wurde so zum Beispiel untersucht, welche Einflussfaktoren die Rekonstruktionsrate nach Mastektomie beeinflussen [72]. Auf Basis der Daten von 109992 Frauen mit einem invasiven Mammakarzinom und 14710 Frauen mit einem DCIS zwischen den Jahren 2000 und 2010 zeigte sich ein dramatischer Unterschied entsprechend dem Versicherungsstatus. Bei einer freien Versicherung lag die Rate der Rekonstruktionen mit einer OR von 2,98 (95%-KI: 2,61–3,49) signifikant höher, während bei den Sozialversicherungen die Rekonstruktionen lediglich marginal höher lagen als bei keiner Versicherung (Medicare 1,58 [95%-KI: 1,37–1,82]; Medicaid [95%-KI: 1,01–1,37]).

Ärztinnen und Ärzte könnten entscheiden, jedoch käme hier rasch eine starke ethische Komponente auf, insbesondere, wenn die Patientin sich teure Therapien nicht leisten kann. Eine Umfrage unter amerikanischen Onkologen zur Frage, wer über die Ressourcen entscheiden sollte, zeigte, dass 60% für die Ärztinnen und Ärzte stimmten, 57% für unabhängige Non-Profit-Organisationen, 37% für die Patientinnen, 21% für die Regierung und 6% für die Kostenträger [73]. Es wird deutlich, dass die Frage nach der idealen Entscheidungsgewalt noch lange nicht geklärt ist. Jedoch haben 80% zugestimmt, dass mehr Daten zu Kosten-Effektivitäts-Analysen notwendig sind – die Gesundheitsökonomie ist hier weiter auf dem Vormarsch.

Ein besonderer Aspekt der Gesundheitsökonomie in der Senologie sind die möglichen Einflüsse der individualisierten bzw. zielgerichteten Therapien. Einerseits sind hier erhöhte Kosten durch vermehrte Testungen, neue, kostenintensive Therapien und eine erhöhte Komplexität möglich, andererseits können aber auch Kosten durch Vermeidung von Übertherapien und bessere Heilungsraten erreicht werden.

In Bezug auf die individualisierte Therapie ist so auch der ökonomische Einfluss von Oncotype DX<sup>®</sup> im Fokus mehrerer Untersuchungen. Eine Studie untersuchte auf Basis der Daten der NSABP-B-14- und B-20-Validierungsstudien die Kosteneffektivität von Oncotype DX<sup>®</sup> in Irland [74]. Hierbei wurden jeweils die Testkosten (3180 €), die Kosten für die Chemotherapeutika (1002 €), Applikation und Überwachung der Chemotherapie (1646 €), die Kosten für Nebenwirkungen (756 €) und supportive präventive Maßnahmen (3561 €) als auch die Kosten für Rezidive (35160 €) berücksichtigt. Durch den Einsatz von Oncotype DX<sup>®</sup> wurden 0,12 QALYs gewonnen. Insgesamt berechneten sich Kosten von 9642 € pro QALY. Mit einer Wahrscheinlichkeit von 74,2% zeigte die Sensitivitätsanalyse, dass die ICER unter 20000 €/QALY liegt. Auch Metaanalysen zu der Thematik liegen vor. So untersuchte eine Studie 9 publizierte Kosten-Effektivitäts-Analysen zu Oncotype DX<sup>®</sup> [75]. Es zeigte sich in der Metaanalyse eine mediane Kosten-Effektivitäts-Ratio von 27000 \$/QALY, sodass die Autoren von einer kosteneffektiven Option ausgehen.

Es wird deutlich, dass Kosten-Nutzwert-Analysen helfen können, die Vor- und Nachteile neuer innovativer diagnostischer als auch therapeutischer Maßnahmen gegeneinander abzuwägen und Transparenz zu schaffen.

## Interessenkonflikt

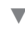

Diese Publikation wurde von der Novartis Pharma GmbH unterstützt. Für den Inhalt dieser Publikation sind die Autoren verantwortlich.

## Institute

- <sup>1</sup> Klinik für Gynäkologie und Geburtshilfe, Marienhospital Bottrop, Bottrop
- <sup>2</sup> Medizinische Klinik und Poliklinik II, Campus Charité Mitte, Berlin
- <sup>3</sup> Frauenklinik, Universitätsklinikum Erlangen, Erlangen
- <sup>4</sup> Department of Gynecology and Obstetrics, University Hospital Aachen
- <sup>5</sup> Frauenklinik, Universitätsklinikum Heidelberg, Heidelberg
- <sup>6</sup> Department of Gynecology and Obstetrics, University Hospital Erlangen, Erlangen
- <sup>7</sup> Department of Obstetrics and Gynecology, University Tübingen, Tübingen
- <sup>8</sup> Frauenklinik, Klinikum der Heinrich-Heine-Universität Düsseldorf, Düsseldorf
- <sup>9</sup> Klinik für Senologie, Kliniken Essen-Mitte, Essen

## Literatur

- 1 *Fasching PA, Fehm T, Janni W et al.* Breast cancer therapy – a state of the art review. *Geburtsh Frauenheilk* 2010; 70: 875–886, DOI: 10.1055/s-0030-1250437
- 2 *Kummel S, Kolberg HC, Luftner D et al.* Breast cancer 2011 – new aspects. *Geburtsh Frauenheilk* 2011; 71: 939–953, DOI: 10.1055/s-0031-1280313
- 3 *Fisher B, Anderson S, Bryant J et al.* Twenty-year follow-up of a randomized trial comparing total mastectomy, lumpectomy, and lumpectomy plus irradiation for the treatment of invasive breast cancer. *N Engl J Med* 2002; 347: 1233–1241, DOI: 10.1056/NEJMoa022152
- 4 *Veronesi U, Cascinelli N, Mariani L et al.* Twenty-year follow-up of a randomized study comparing breast-conserving surgery with radical mastectomy for early breast cancer. *N Engl J Med* 2002; 347: 1227–1232, DOI: 10.1056/NEJMoa020989
- 5 *Bani HA, Fasching PA, Lux MM et al.* Lymphedema in breast cancer survivors: assessment and information provision in a specialized breast unit. *Patient education and counseling* 2007; 66: 311–318, DOI: 10.1016/j.pec.2007.01.004
- 6 *Veronesi U, Paganelli G, Viale G et al.* A randomized comparison of sentinel-node biopsy with routine axillary dissection in breast cancer. *N Engl J Med* 2003; 349: 546–553, DOI: 10.1056/NEJMoa012782
- 7 *Kühn T.* Mammakarzinom. Stellenwert des axillären Stagings. *Gynäkologe* 2011; 44: 999–1004
- 8 *Galimberti V, Cole BF, Zurrada S et al.* Update of International Breast Cancer Study Group trial 23-01 to compare axillary dissection versus no axillary dissection in patients with clinically node negative breast cancer and micrometastases in the sentinel node. *Cancer Res* 2011; 71: 102 s
- 9 *Moebus V, Jackisch C, Lueck HJ et al.* Intense dose-dense sequential chemotherapy with epirubicin, paclitaxel, and cyclophosphamide compared with conventionally scheduled chemotherapy in high-risk primary breast cancer: mature results of an AGO phase III study. *J Clin Oncol* 2010; 28: 2874–2880, DOI: 10.1200/JCO.2009.24.7643
- 10 *Engel J, Lebeau A, Sauer H et al.* Are we wasting our time with the sentinel technique? Fifteen reasons to stop axilla dissection. *Breast* 2006; 15: 452–455, DOI: 10.1016/j.breast.2005.05.009
- 11 *Giuliano AE, Hunt KK, Ballman KV et al.* Axillary dissection vs. no axillary dissection in women with invasive breast cancer and sentinel node metastasis: a randomized clinical trial. *JAMA* 2011; 305: 569–575, DOI: 10.1001/jama.2011.90
- 12 *Krag DN, Anderson SJ, Julian TB et al.* Sentinel-lymph-node resection compared with conventional axillary-lymph-node dissection in clinically node-negative patients with breast cancer: overall survival findings from the NSABP B-32 randomised phase 3 trial. *Lancet Oncol* 2010; 11: 927–933, DOI: 10.1016/S1470-2045(10)70207-2
- 13 *Arbeitsgemeinschaft für Gynäkologische Onkologie e.V.* AGO Guidelines. [www.ago-online.org](http://www.ago-online.org); Stand: 2012
- 14 *Veronesi U, Orecchia R, Luini A et al.* Intraoperative radiotherapy during breast conserving surgery: a study on 1,822 cases treated with electrons. *Breast Cancer Res Treat* 2010; 124: 141–151, DOI: 10.1007/s10549-010-1115-5
- 15 *Vaidya JS, Baum M, Tobias JS et al.* Long-term results of targeted intraoperative radiotherapy (Targit) boost during breast-conserving surgery. *Int J Radiat Oncol, Biol, Phys* 2011; 81: 1091–1097, DOI: 10.1016/j.ijrobp.2010.07.1996

- 16 Smith GL, Xu Y, Buchholz TA et al. Partial breast brachytherapy is associated with inferior effectiveness and increased toxicity compared with whole breast irradiation in older patients. *Cancer Res* 2011; 71: 99 s
- 17 Cutuli B, Cohen-Solal-le Nir C, de Lafontan B et al. Breast-conserving therapy for ductal carcinoma in situ of the breast: the French Cancer Centers' experience. *Int J Radiat Oncol, Biol, Phys* 2002; 53: 868–879
- 18 Clarke M, Collins R, Darby S et al. Effects of radiotherapy and of differences in the extent of surgery for early breast cancer on local recurrence and 15-year survival: an overview of the randomised trials. *Lancet* 2005; 366: 2087–2106, DOI: 10.1016/S0140-6736(05)67887-7
- 19 Bijker N, Meijnen P, Peterse JL et al. Breast-conserving treatment with or without radiotherapy in ductal carcinoma-in-situ: ten-year results of European Organisation for Research and Treatment of Cancer randomized phase III trial 10853 – a study by the EORTC Breast Cancer Cooperative Group and EORTC Radiotherapy Group. *J Clin Oncol* 2006; 24: 3381–3387, DOI: 10.1200/JCO.2006.06.1366
- 20 Hughes LL, Wang M, Page DL et al. Local excision alone without irradiation for ductal carcinoma in situ of the breast: a trial of the Eastern Cooperative Oncology Group. *J Clin Oncol* 2009; 27: 5319–5324, DOI: 10.1200/JCO.2009.21.8560
- 21 Solin LJ, Gray R, Baehner FL et al. A quantitative multigene RT-PCR assay for predicting recurrence risk after surgical excision alone without irradiation for ductal carcinoma in situ (DCIS): a prospective validation study of the DCIS score from ECOG E5194. *Cancer Res* 2011; 71: 108 s
- 22 Untch M, von Minckwitz G. Neoadjuvant treatment of breast cancer. *Breast Care (Basel)* 2011; 6: 417, DOI: 10.1159/000335444
- 23 von Minckwitz G, Eidtmann H, Rezai M et al. Neoadjuvant chemotherapy and bevacizumab for HER2-negative breast cancer. *N Engl J Med* 2012; 366: 299–309, DOI: 10.1056/NEJMoa1111065
- 24 Untch M, Loibl S, Bischoff J et al. Lapatinib versus trastuzumab in combination with neoadjuvant anthracycline-taxane-based chemotherapy (GeparQuinto, GBG 44): a randomised phase 3 trial. *Lancet Oncol* 2012; 13: 135–144, DOI: 10.1016/S1470-2045(11)70397-7
- 25 Untch M, Fasching PA, Konecny GE et al. Pathologic complete response after neoadjuvant chemotherapy plus trastuzumab predicts favorable survival in human epidermal growth factor receptor 2-overexpressing breast cancer: results from the TECHNO trial of the AGO and GBG study groups. *J Clin Oncol* 2011; 29: 3351–3357, DOI: 10.1200/JCO.2010.31.4930
- 26 von Minckwitz G, Untch M, Nuesch E et al. Impact of treatment characteristics on response of different breast cancer phenotypes: pooled analysis of the German neo-adjuvant chemotherapy trials. *Breast cancer research and treatment* 2011; 125: 145–156, DOI: 10.1007/s10549-010-1228-x
- 27 von Minckwitz G, Untch M, Blohmer JU et al. Definition and impact of pathologic complete response on prognosis after neoadjuvant chemotherapy in various intrinsic breast cancer subtypes. *J Clin Oncol* 2012; DOI: 10.1200/JCO.2011.38.8595
- 28 Gianni L, Bianchini G, Kiermaier A et al. Neoadjuvant pertuzumab and trastuzumab: biomarker analyses of a 4-arm randomized phase II study (NeoSphere) in patients with HER2-positive breast cancer. *Cancer Res* 2011; 71: 109 s–110 s
- 29 Gianni L, Pienkowski T, Im YH et al. Efficacy and safety of neoadjuvant pertuzumab and trastuzumab in women with locally advanced, inflammatory, or early HER2-positive breast cancer (NeoSphere): a randomised multicentre, open-label, phase 2 trial. *Lancet Oncol* 2012; 13: 25–32, DOI: 10.1016/S1470-2045(11)70336-9
- 30 Schneeweiss A, Chia S, Hickish T et al. Neoadjuvant pertuzumab and trastuzumab concurrent or sequential with an anthracycline-containing or concurrent with an anthracycline-free standard regimen: A randomized phase II study (TRYPHAENA). *Cancer Res* 2011; 71: 112 s–113 s
- 31 Fasching PA, Heusinger K, Haeberle L et al. Ki67, chemotherapy response, and prognosis in breast cancer patients receiving neoadjuvant treatment. *BMC cancer* 2011; 11: 486, DOI: 10.1186/1471-2407-11-486
- 32 Liedtke C, Mazouni C, Hess KR et al. Response to neoadjuvant therapy and long-term survival in patients with triple-negative breast cancer. *J Clin Oncol* 2008; 26: 1275–1281, DOI: 10.1200/JCO.2007.14.4147
- 33 Loibl S, von Minckwitz G, Blohmer JU et al. pCR as a surrogate in HER2-positive patients treated with trastuzumab. *Cancer Res* 2011; 71: 111 s
- 34 Cheang MCU, Prat A, Fan C et al. PAM50 HER2-enriched subtype enriches for tumor response to neoadjuvant anthracyclines/taxane and trastuzumab/taxane containing regimens in HER2-positive breast cancer. *Cancer Res* 2011; 71: 110 s
- 35 von Minckwitz G, Kümmel S, Vogel P et al. Neoadjuvant vinorelbine–capecitabine versus docetaxel–doxorubicin–cyclophosphamide in early nonresponsive breast cancer: phase III randomized GeparTrio trial. *J Natl Cancer Inst* 2008; 100: 542–551
- 36 Goldhirsch A, Wood WC, Coates AS et al. Strategies for subtypes – dealing with the diversity of breast cancer: highlights of the St. Gallen International Expert Consensus on the Primary Therapy of Early Breast Cancer 2011. *Ann Oncol* 2011; 22: 1736–1747, DOI: 10.1093/annonc/mdr304
- 37 von Minckwitz G, Eidtmann H, Loibl S et al. Integrating bevacizumab, everolimus, and lapatinib into current neoadjuvant chemotherapy regimen for primary breast cancer. Safety results of the GeparQuinto trial. *Ann Oncol* 2011; 22: 301–306, DOI: 10.1093/annonc/mdq350
- 38 Huober J, Hanusch C, Fasching PA et al. Neoadjuvant chemotherapy of paclitaxel with or without Rad001: results of the non-responder part of the GEPARQUINTO study (GBG 44). *Cancer Res* 2011; 71: 105 s
- 39 Gnant M, Mlineritsch B, Schippinger W et al. Endocrine therapy plus zoledronic acid in premenopausal breast cancer. *N Engl J Med* 2009; 360: 679–691, DOI: 10.1056/NEJMoa0806285
- 40 Gnant M, Mlineritsch B, Luschin-Ebengreuth G et al. Long-term follow-up in ABCSG-12: significantly improved overall survival with adjuvant zoledronic acid in postmenopausal patients with endocrine-receptor-positive early breast cancer. *Cancer Res* 2011; 71: 95 s–96 s
- 41 de Boer R, Bundred N, Eidtmann H et al. Long-term survival outcomes among postmenopausal women with hormone receptor-positive early breast cancer receiving adjuvant letrozole and zoledronic acid: 5-year follow-up of ZO-FAST. *Cancer Res* 2011; 71: 96 s
- 42 Coleman RE, Marshall H, Cameron D et al. Breast-cancer adjuvant therapy with zoledronic acid. *N Engl J Med* 2011; 365: 1396–1405, DOI: 10.1056/NEJMoa1105195
- 43 Diel IJ, Jaschke A, Solomayer EF et al. Adjuvant oral clodronate improves the overall survival of primary breast cancer patients with micrometastases to the bone marrow: a long-term follow-up. *Ann Oncol* 2008; 19: 2007–2011, DOI: 10.1093/annonc/mdn429
- 44 Powles T, Paterson S, Kanis JA et al. Randomized, placebo-controlled trial of clodronate in patients with primary operable breast cancer. *J Clin Oncol* 2002; 20: 3219–3224
- 45 Paterson AHG, Anderson SJ, Lembersky BC et al. NSABP protocol B-34: a clinical trial comparing adjuvant clodronate vs. placebo in early stage breast cancer patients receiving systemic chemotherapy and/or tamoxifen or no therapy – final analysis. *Cancer Res* 2011; 71: 100 s
- 46 Moebus V, Thomssen C, Harbeck N et al. Gain (German Adjuvant Inter-group Node Positive) study: a phase-III multicenter trial to compare dose dense, dose intense ETC (iddETC) vs. EC-TX and Ibandronate vs. observation in patients with node-positive primary breast cancer – 1st interim efficacy analysis. *Cancer Res* 2011; 71: 6 s
- 47 Janni WJ, Harbeck N, Sommer H et al. Sequential treatment with epirubicin/cyclophosphamide, followed by docetaxel vs. FEC120 in the adjuvant treatment of breast cancer patients with extensive lymph node involvement: final survival analysis of the German ADEBAR phase III study. *Cancer Res* 2011; 71: 140 s
- 48 Untch M, Fasching PA, Konecny GE et al. PREPARE trial: a randomized phase III trial comparing preoperative, dose-dense, dose-intensified chemotherapy with epirubicin, paclitaxel and CMF versus a standard-dosed epirubicin/cyclophosphamide followed by paclitaxel ± darbepoetin alfa in primary breast cancer – results at the time of surgery. *Ann Oncol* 2011; 22: 1988–1998, DOI: 10.1093/annonc/mdq709
- 49 Untch M, von Minckwitz G, Konecny GE et al. PREPARE trial: a randomized phase III trial comparing preoperative, dose-dense, dose-intensified chemotherapy with epirubicin, paclitaxel, and CMF versus a standard-dosed epirubicin-cyclophosphamide followed by paclitaxel with or without darbepoetin alfa in primary breast cancer – outcome on prognosis. *Ann Oncol* 2011; 22: 1999–2006, DOI: 10.1093/annonc/mdq713
- 50 Nitz U, Gluz O, Oberhoff C et al. Adjuvant chemotherapy with or without darbepoetin alpha in node-positive breast cancer: survival and quality of life analysis from the prospective randomized WSG ARA plus trial. *Cancer Res* 2011; 71: 143 s

- 51 Goss P, Smith I, O'Shaughnessy J *et al.* Results of a randomized, double-blind, multicenter, placebo-controlled study of adjuvant lapatinib in women with early-stage ErbB2-overexpressing breast cancer. *Cancer Res* 2011; 71: 109 s
- 52 Baselga J, Cortes J, Kim SB *et al.* Pertuzumab plus trastuzumab plus docetaxel for metastatic breast cancer. *N Engl J Med* 2012; 366: 109–119, DOI: 10.1056/NEJMoa1113216
- 53 Saura C, Garcia-Saenz JA, Xu B *et al.* Safety and efficacy of neratinib in combination with capecitabine in patients with ErbB2-positive breast cancer. *Cancer Res* 2011; 71: 225 s
- 54 Gianni L, Romieu G, Lichinitser M *et al.* First results of AVEREL, a randomized phase III trial to evaluate bevacizumab (BEV) in combination with trastuzumab (H) + docetaxel (DOC) as first-line therapy for HER2-positive locally recurrent/metastatic breast cancer (LR/mBC). *Cancer Res* 2011; 71: 109 s
- 55 Blackwell KL, Miles D, Gianni L *et al.* Primary results from EMILIA, a phase III study of trastuzumab emtansine (T-DM1) versus capecitabine (X) and lapatinib (L) in HER2-positive locally advanced or metastatic breast cancer (MBC) previously treated with trastuzumab (T) and a taxane. *J Clin Oncol* 2012; 30 (suppl; abstr 512)
- 56 Xu B, Guan ZZ, Shen ZZ *et al.* Association of PTEN loss and PIK3CA mutations on outcome in HER2+ metastatic breast cancer patients treated with first-line lapatinib plus paclitaxel or paclitaxel alone. *Cancer Res* 2011; 71: 103 s–104 s
- 57 Colleoni M, Giobbie-Hurder A, Regan MM *et al.* Analyses adjusting for selective crossover show improved overall survival with adjuvant letrozole compared with tamoxifen in the BIG 1-98 study. *J Clin Oncol* 2011; 29: 1117–1124, DOI: 10.1200/JCO.2010.31.6455
- 58 Paridaens RJ, Dirix LY, Beex LV *et al.*; *The European Organisation for Research and Treatment of Cancer Breast Cancer Cooperative Group.* Phase III study comparing exemestane with tamoxifen as first-line hormonal treatment of metastatic breast cancer in postmenopausal women. *J Clin Oncol* 2008; 26: 4883–4890, DOI: 10.1200/JCO.2007.14.4659
- 59 Mouridsen H, Gershanovich M, Sun Y *et al.* Phase III study of letrozole versus tamoxifen as first-line therapy of advanced breast cancer in postmenopausal women: analysis of survival and update of efficacy from the International Letrozole Breast Cancer Group. *J Clin Oncol* 2003; 21: 2101–2109, DOI: 10.1200/JCO.2003.04.194
- 60 Nabholz JM, Bonneterre J, Buzdar A *et al.* Anastrozole (Arimidex) versus tamoxifen as first-line therapy for advanced breast cancer in postmenopausal women: survival analysis and updated safety results. *Eur J Cancer* 2003; 39: 1684–1689
- 61 Bergh J, Jonsson PE, Lidbrink EK *et al.* FACT: an open-label randomized phase III study of fulvestrant and anastrozole in combination compared with anastrozole alone as first-line therapy for patients with receptor-positive postmenopausal breast cancer. *J Clin Oncol* 2012; DOI: 10.1200/JCO.2011.38.1095
- 62 Mehta RS, Barlow WE, Albain KS *et al.* A Phase III randomized trial of anastrozole versus anastrozole and fulvestrant as first-line therapy for postmenopausal women with metastatic breast cancer: SWOG S0226. *Cancer Res* 2011; 71: 95 s
- 63 Baselga J, Campone M, Piccart M *et al.* Everolimus in postmenopausal hormone-receptor-positive advanced breast cancer. *N Engl J Med* 2012; 366: 520–529, DOI: 10.1056/NEJMoa1109653
- 64 Piccart-Gebhart MJ, Noguchi S, Pritchard KI *et al.* Everolimus for postmenopausal women with advanced breast cancer: Updated results of the BOLERO-2 phase III trial. *J Clin Oncol* 2012; 30 (suppl; abstr 559)
- 65 Statistisches Bundesamt. Gesundheit – Ausgaben (Lange Reihe) – Fachserie 12, Reihe 7.1.2 – 1995 bis 2012. Erschienen am 5.4.2012. Artikelnummer: 2120712107004
- 66 Lux MP, Fasching PA, Loehberg CR *et al.* Health services research and health economy – quality care training in gynaecology, with focus on gynaecological oncology. *Geburtsh Frauenheilk* 2011; 71: 1046–1055, DOI: 10.1055/s-0031-1280435
- 67 Mariotto AB, Yabroff KR, Shao Y *et al.* Projections of the cost of cancer care in the United States: 2010–2020. *J Natl Cancer Inst* 2011; 103: 117–128, DOI: 10.1093/jnci/djq495
- 68 Chereau E, Vataire AL, Laas E *et al.* Economic analysis of chemotherapy costs for adjuvant therapy in breast cancer in France. *Cancer Res* 2011; 71: 214 s–215 s
- 69 Baffert S, Cottu PH, Kirova Y *et al.* Burden of brain metastases in HER2-positive breast cancer: healthcare use and costs from a French observational retrospective multicenter study. *Cancer Res* 2011; 71: 212 s–213 s
- 70 Reed SD, Li Y, Anstrom KJ *et al.* Cost effectiveness of ixabepilone plus capecitabine for metastatic breast cancer progressing after anthracycline and taxane treatment. *J Clin Oncol* 2009; 27: 2185–2191
- 71 Centers for Medicare & Medicaid Services, Office of the Actuary. Updated national health expenditure projections 2009–2019. <https://www.cms.gov/Research-Statistics-Data-and-Systems/Statistics-Trends-and-Reports/NationalHealthExpendData/downloads/proj2009pdf>; Stand: September 2011
- 72 Hershman DL, Neugut AI, Richards CA *et al.* Influence of hospital factors, physician factors and type of health insurance on receipt of immediate postmastectomy reconstruction in young women with breast cancer. *Cancer Res* 2011; 71: 114 s–115 s
- 73 Neumann PJ, Palmer JA, Nadler E *et al.* Cancer therapy costs influence treatment: a national survey of oncologists. *Health Affairs* 2010; 29: 196–202
- 74 Lacey L, Chien R, Hornberger J. Cost-utility of the 21-gene breast cancer assay (Oncotype DX®) in the Irish healthcare setting. *Cancer Res* 2011; 71: 213 s
- 75 Pronzato P, Plun-Favreau J. Is the 21-gene breast cancer test (Oncotype DX®) cost-effective? *Cancer Res* 2011; 71: 213 s–214 s
- 76 Warren JL, Yabroff KR, Meekins A *et al.* Evaluation of trends in the cost of initial cancer treatment. *J Natl Cancer Inst* 2008; 100: 888–897
- 77 von Minckwitz G, Blohmer JU, Costa SD *et al.* Neoadjuvant chemotherapy adapted by interim response improves overall survival of primary breast cancer patients – results of the GeparTrio trial. *Cancer Res* 2011; 71: 103 s
